# Supplementary material for: Livestock abortion surveillance in Tanzania reveals disease priorities and importance of timely collection of vaginal swab samples for attribution
Source: eLife. 2024 Dec 16;13:RP95296. doi: 10.7554/eLife.95296 (PMC11649233; doi:10.7554/eLife.95296)
Supplement: Supplementary file 5. [file elife-95296-supp5.xlsx]

## Sheet: Expected Abortions
												Reported abortions (SEBI)				Expected no. abortions over 24 month SEBI study			% investigated
Ward	District	Agroecological	Cattle local	Cattle improved	Cattle total	Goats local	Goats improved	Goats total	Sheep local	Sheep improved	Sheep total	Cattle	Goats	Sheep	Cattle	Goats	Sheep	Cattle	Goats	Sheep
Arri	Babati	SH			5625			5236			1933	1	1	0	275.723	1225.46	452.408	0.362683	0.0816023	0
Arusha Chini	Moshi Rural	SH	8125		8125	1600		1600	7870		7870	11	3	0	398.267	374.471	1841.93	2.76197	0.801131	0
Engarenaibor	Longido	P	15889		15889	51336		51336	17088		17088	0	12	12	778.838	12014.9	3999.35	0	0.099876	0.300049
Engikaret	Longido	P	21798		21798	35017		35017	21135		21135	0	25	2	1068.48	8195.53	4946.53	0	0.305044	0.0404324
Kansay	Karatu	AP	28618		28618	14550		14550	4958		4958	0	1	0	1402.78	3405.34	1160.39	0	0.0293656	0
Kikwe/Nambala village	Meru	SH	21310	4090	25400	19358	2114	21472	549	192	741	1	1	0	1245.04	5025.4	173.427	0.0803185	0.0198989	0
Kimokouwa	Longido	P	17585		17585	22758		22758	15253		15253	0	4	1	861.971	5326.38	3569.88	0	0.0750979	0.0280122
Kindi	Moshi Rural	SH	5634		5634	1443		1443	5987		5987	1	0	0	276.164	337.726	1401.22	0.362103	0	0
Machame Mashariki	Hai	SH	6099		6099			5151			1433	37	0	0	298.957	1205.56	335.385	12.3764	0	0
Magugu/Sarame	Babati	AP	11670	381	12051	11847	51	11898			4839	0	0	1	590.709	2784.66	1132.54	0	0	0.0882971
Meserani	Monduli	P	10694		10694	10487		10487	7028		7028	3	2	0	524.192	2454.42	1644.86	0.572309	0.0814856	0
Selela	Monduli	P	46166		46166	42274		42274	51908		51908	14	42	28	2262.94	9893.99	12148.8	0.618665	0.4245	0.230476
Rau/Uru Kusini	Moshi Municipality	SH			3399			3313			1107	3	9	0	166.61	775.389	259.087	1.80061	1.16071	0
												71	100	44
TOTAL wards where we have livestock data					207083			226535			141280	71	100	44	10150.7	53019.2	33065.8	0.699461	0.188611	0.133068
TOTAL SH wards where we have livestock data					54282			38215			19071	54	14	0	2006.43	6703.26	5422.57	2.69135	0.208854	0
TOTAL AP wardswhere we have livestock data					40669			26448			9797	0	1	1	1402.78	3405.34	1160.39	0	0.0293656	0.0861778
TOTAL P wards where we have livestock data					112132			161872			112412	17	85	43	5496.42	37885.2	26309.4	0.309292	0.224362	0.16344
FROM SEEDZ QUESTIONNAIRE			Cattle	Goats	Sheep
Abortions in household (over 12 month period)			213	766	418
Abortions in compound (over 12 month period)			337	710	369
Total Abortions			550	1476	787
Total Livestock at compounds in SEEDZ HH			22441	12613	10536
Abortions/head of livestock			0.0245087	0.117022	0.0746963
NOTE: No livestock data from Machame Mashariki through the Ministry census, but figures for 2023 provided by the LFO (conveyed orally to the research team)
NOTE: Rau data is based on average of four Uru wards (former name of Rau) (Takwimu za mifugo Kilimanjaro_v3_combined.xls)
