# Supplementary material for: Livestock abortion surveillance in Tanzania reveals disease priorities and importance of timely collection of vaginal swab samples for attribution
Source: eLife. 2024 Dec 16;13:RP95296. doi: 10.7554/eLife.95296 (PMC11649233; doi:10.7554/eLife.95296)
Supplement: Supplementary file 6. [file elife-95296-supp6.xlsx]

## Sheet: Moshi DCDistrict
TARAFA	WARD	VILLAGE		NUMBER OF LIVESTOCK
			CATTLE	SHEEP	GOATS	PIGS	RABBITS	CHICKENS	DOGS	CATS	DONKEYS
Vunjo Mashariki	Mwika kusini	Kimangaro	1041	1334	350	1980		6380
		Mawanjeni	1260	1578	443	2210	-	5760
		Kondeni	988	1062	311	2300	-	5997
		Matala	1111	990	360	2400	-	6013
		Kiruweni	109	1053	123	1008	-	7734
JUMLA		5	5209	6017	1587	9898	--	31884	890	392	-
	Kirua vunjo kusini	Uchira	1094	1600	307	102	-	5866
		Mabungo	1262	1360	310	90	-	5004
		Yam Makaa	998	1580	297	206	-	5997
		Yamu	866	970	320	232	-	5700
		Uparo	1249	1480	278	402	-	6713
JUMLA		5	5469	6990	1512	1032	-	29280	1120	600	-
	Kilema kusini	Kilototoni	769	1015	271	280	-	5700
		Kilema Pofo	849	957	190	292	226	6910
		Masaera	910	1183	182	181	320	6279
		Leghomulo	898	1177	213	177	-	4912
		Kilema Chini	800	882	200	283	262	3678
		Marawe Kyura	1058	897	271	465	-	6621
JUMLA		6	5282	6111	1266	1678	908	34100	1300	654	-
	Kirua vunjo mashariki	Kileuo	1191	1254	292	330	-	8439
		Nganjoni	1593	1262	470	321	-	6980
		Mero	933	1490	362	344	-	7665
		Mrumeni	1191	974	292	314	-	7828
JUMLA		4	4957	4980	1498	1309	-	30912	800	551	-
	Makuyuni	Makuyuni	2464	2760	575	300	-	9220
		Lotima	2360	2614	600	295	-	10120
		Himo	1016	2608	510	292	-	9360
JUMLA		3	5840	7982	1685	887	-	28700	1320	364	93
Hai mashariki	Arusha chini	Chemchem	3925	4005	710	450	-	13900
		Mikocheni	4200	3865	890	440	-	12302
JUMLA		2	8125	7870	1600	890	-	26202	1676	624	239
	Mabogini	Mtakuja	1649	1794	500	207	-	6712
		Mvuleni	1559	1287	512	180		6010
		Chekereni	1876	1334	470	187		5849
		Mabogini	1511	1605	435	200	-	6138
JUMLA		4	6595	6020	1917	774	-	24709	1400	265	210
	Kahe mashariki	Kiterini	1067	1670	381	160	-	6220
		Kyomu	957	1432	420	188	-	5159
		Soko	1365	1694	399	203	-	5285
		Kochakindo	1213	1810	277	211	-	6187
		Ghona	1152	2089	379	198	-	7249
JUMLA		5	5754	8695	1856	960	-	30100	1054	321	197
	Kahe	Mwangaria	1085	1581	492	140	-	5800
		Ngasinyi	1458	1600	300	170	-	5669
		Kisangesageni	1992	1500	285	166	-	4914
		Mawala	1849	1650	296	145	-	4800
		Oria	938	1236	301	159	-	5400
		Rau river	1387	1323	336	100	-	4617
JUMLA		6	8709	8890	2010	880	-	31200	1765	426	162
Kibosho	Kindi	Kindi	1508	1596	397	464	-	8560
		Msasani	1331	1416	311	312	200	8109
		Sambarai	1603	1317	365	298	300	7917
		Chekereni weruweru	1192	1658	370	360	118	7624
JUMLA		4	5634	5987	1443	1434	618	32210	790	332	-
Kibosho	Kirima	Boro	1506	1379	490	560	-	12400
		Kirima juu	2117	1413	502	590	-	12194
		Kirima kati	1866	1047	479	517	-	9106
JUMLA		3	5489	3839	1471	1667	-	33700	650	219	-
	Okaoni	Omarini	670	483	238	263	-	4910
		Kitandu	892	568	160	280	-	4872
		Mloe	582	417	140	286	-	4511
		Sisamaro	498	520	130	290	-	7966
		Mkomilo	502	442	142	203	-	5793
		Dakau	817	470	150	253	-	5124
JUMLA		6	3961	2900	960	1572	-	33176	640	376	-
	Kibosho magharibi	Manushi ndoo	779	744	150	192	-	4800
		Manushisinde	712	654	170	222	-	4212
		Kombo	864	516	160	231	-	3870
		Mkomongo	661	602	152	182	-	3700
		Kifuni	679	760	140	189	-	3655
		Umbwe sinde	907	670	144	230	-	4014
		Umbwe onana	809	572	116	136	-	5948
JUMLA		7	5411	4518	1032	1382	-	30199	890	470	-
	Kibosho Mashariki	Mweka	1195	1500	231	565	-	10344
		Singa	1900	1610	340	580	-	11990
		Sungu	1697	1230	328	543	-	12666
JUMLA		3	4792	4340	899	1688	-	35000	1230	548	-
	Kibosho kati	Mauwa	951	950	170	297		8219
		Uchau Kaskazini	883	930	182	281	-	7768
		Uchau Kusini	1000	876	168	290	-	6912
		Uri	990	810	142	182	-	7690
		Otaruni	990	1134	188	386	-	8163
JUMLA		5	4752	4700	850	1436	-	38752	1322	380	-
Hai East	Kimochi	Mowo	1525	1005	455	325	186	9398
		Shia	1660	1010	312	193	234	9912
		Mdawi	1718	1211	410	275	180	8170
		Sango	1162	783	245	292	89	9398
JUMLA		4	6065	4009	1422	1085	689	37000	977	453	-
	Old Moshi magharibi	Tella	1310	1533	480	480	700	13560
		Mande	1123	1628	492	430	589	14100
		Mandaka mnono	898	1424	443	460	-	12259
		3	3331	4585	1415	1370	1289	39917	644	380	-
	Mbokomu	Korini juu	1880	1470	460	670	320	14033
		Korini kusini	2007	1560	471	362	289	11818
		Tema	1940	1381	448	365	218	12926
JUMLA		3	5827	4411	1379	1397	827	38777	768	429	-
	Uru mashariki	Kishumundu	578	565	190	202	254	3742
		Mruiya	497	610	207	179	360	3847
		Mnini	488	517	188	165	466	2852
		Materuni	612	477	210	152	-	3170
		Mwasi kaskazini	600	607	175	160	-	3510
		Mwasi kusini.	449	512	170	182	-	3776
		Kyaseni	578	599	220	170	-	6223		313	-
JUMLA		7	3761	3887	1360	1210	1080	27120	428
	Uru Shimbwe	Shimbwe juu	1497	1398	635	1000	-	16800
		Shimbwe chini	1693	1199	600	992	-	15500
JUMLA		2	3190	2597	1235	1992	-	32300	598	388	-
	Uru kusini	Okaseni	464	677	180	286	540	5648
		Kitandu	563	620	167	170	670	6200
		Longuo	512	617	158	189	680	4313
		Kimanganuni	663	669	194	195	310	4800
		Kariwa	401	580	180	200	-	5515
		Rau	477	635	168	230	-	6324
JUMLA		6	3080	3798	1047	1270	2200	32800	888	576	-
	Old moshi mashariki	Kidia	778	1021	330	283		6275
		Tsuduni	589	1317	323	293	359	6527
		Kikarara	708	983	190	271	200	5810
		Mahoma	695	764	321	296	470	7497
JUMLA		4	2770	4085	1164	1146	1029	26109	676	445	-
	Uru kaskazini	Msuni	890	745	196	320	-	7667
		Ongoma	792	790	215	298	-	7000
		Mrawi	904	680	200	301	-	6916
		Njari	936	754	176	341	-	5084
JUMLA		4	3522	2969	787	1260	-	26667	810	300	-
Vunjo Mashariki	Kilema Kaskazini	Makame juu	1292	1307	237	472	900	6335
		Makame chini	1389	1410	189	277	800	8901
		Kyou	1190	1385	214	380	650	8780
		Ruwa	1250	889	220	392	668	9307
JUMLA	JUMLA	4	5121	4991	860	1521	3018	33323	390	661	-
	Kilema kati	Kimaroroni	1030	1300	232	494	-	8594
		Ngangu	1110	1400	259	348	-	7910
		Mkyashi	1010	1310	211	383	-	7760
		Rosho	967	710	188	464	-	6112
JUMLA		4	4117	4800	890	1689	-	30376	298	432	-
	Mwika Kaskazini	Lole Marera	956	907	406	346	400	7218
		Maring’a	910	1272	182	283	600	4660
		Msae Nganyeni	870	976	197	292	-	6718
		Mrimbo uuwo	797	821	255	311	-	6800
		Msae Kinyamvuo	1195	1012	260	320	-	5613
JUMLA		5	4728	4988	1300	1552	1000	31009	810	466	-
	Marangu magharibi	Kitowo	768	824	140	251	-	6579
		Kiraracha	790	704	137	260	-	6720
		Komalyangoe	902	710	122	190	-	5440
		Kyala	577	677	162	282	-	5373
		Nduweni	560	661	150	170	-	5110
		Komela	522	702	143	230	-	4990
		Mbahe	1192	639	116	307	-	4811
JUMLA		7	5312	4917	970	1690	-	39021	706	410	-
	Marangu Mashariki	Sembeti	650	850	114	187	500	4410
		Lyamrakana	885	905	170	168	-	4222
		Arisi	990	712	167	150	412	4943
		Lyasongoro	918	767	155	149	-	4823
		Samanga	1007	790	201	158	-	4337
		Mshiri	792	869	213	170	-	4500
		Rauya	756	1051	114	260	-	3635
JUMLA		7	5998	5944	1200	1242	912	30870	752	309	-
	Mamba kaskazini	Mboni	1289	1426	235	248	-	6845
		Komakundi	1391	1502	212	260	-	6260
		Kokirie	991	1517	196	271	-	6172
		Kotela	1086	1221	227	193	-	7703
JUMLA		4	4757	5666	870	972	-	26980	360	259	-
	Mamba kusini	Lekura	685	671	140	320	-	6450
		Kiria	702	516	150	309	560	6132
		Mkolowoni	710	580	155	292	330	5790
		Kimangara	590	605	161	384	-	5610
		Kimbogho	791	687	108	316	-	7245
JUMLA		5	3478	3059	714	1521	890	31227	289	388	-
Vunjo magharibi	Kirua vunjo Magharibi	Nduoni	687	914	180	230	-	5606
		Maruwa	690	811	192	249	-	4319
		Kanango	698	620	202	270	-	4170
		Kanji	600	582	213	185	-	4267
		Kwamare	712	577	179	190	-	3978
		Manu	563	694	181	197	-	3810
		Iwa	796	783	143	270	-	5534	471	350	-
JUMLA		7	4746	4981	1290	1591	-	31684
JUMLA KUU		145	162782	159326	39691	40586	14460	985304	26712	13390	901

## Sheet: MonduliDistrict
Region	District	Ward	Village	Cow	Goat	Sheep	Dog	Pig
Arusha	Monduli	Lepurko	Lepurko Shuleni	3278	3633	2154	126	0
Arusha	Monduli	Lepurko	Eng'arooji	2822	3215	1675	87	0
Arusha	Monduli	Lepurko	Mti mmoja	4766	3548	2179	129	0
Arusha	Monduli	Lepurko	Losimingori	7938	2702	3266	186	0
Arusha	Monduli	Lepurko	Nanja	2564	3688	1688	326	0
Arusha	Monduli	Lepurko		21368	16786	10962	854	0
Arusha	Monduli	Meserani	Meserani juu	4751	3966	3452	388	0
Arusha	Monduli	Meserani	Naaarami	4643	3783	2311	124	0
Arusha	Monduli	Meserani	Bwawani	1300	2738	1265	144	0
Arusha	Monduli	Meserani		10694	10487	7028	656	0
Arusha	Monduli	Sepeko	Arkaria	3628	2189	2189	125	0
Arusha	Monduli	Sepeko	Arkatan	1461	2534	1534	93	16
Arusha	Monduli	Sepeko	Lashaine	1814	2328	1328	137	0
Arusha	Monduli	Sepeko	Lendikinya	1089	3377	1377	114	0
Arusha	Monduli	Sepeko		7992	10428	6428	469	16
Arusha	Monduli	Monduli Juu	Eluway	1976	3276	1276	149	0
Arusha	Monduli	Monduli Juu	Enguik	2014	2643	1643	176	13
Arusha	Monduli	Monduli Juu	Mfereji	2376	3274	1274	127	0
Arusha	Monduli	Monduli Juu	Idonyonado	1264	3193	1193	113	0
Arusha	Monduli	Monduli Juu	Emairete	3412	4215	1215	278	26
Arusha	Monduli	Monduli Juu		11042	16601	6601	843	39
Arusha	Monduli	Moita	Kilimatinde	2666	2286	1286	118	0
Arusha	Monduli	Moita	Moita Kiloriti	2388	2168	1168	192	0
Arusha	Monduli	Moita	Moita Bwawani	2392	2173	1173	134	24
Arusha	Monduli	Moita	Moita Kipok	2744	1766	1766	112	0
Arusha	Monduli	Moita		10190	8393	5393	556	24
Arusha	Monduli	Engutoto	Olarash	1538	844	893	208	54
Arusha	Monduli	Engutoto	Ngarash	1645	1055	1055	195	38
Arusha	Monduli	Engutoto	Mlimani	1566	654	654	244	49
Arusha	Monduli	Engutoto		4749	2553	2602	647	141
Arusha	Monduli	Monduli Mjini	TMA & SOFA JESHINI	0	459	276	198	71
Arusha	Monduli	Monduli Mjini	Monduli Mjini	168	132	83	188	122
Arusha	Monduli	Monduli Mjini		168	591	359	386	193
Arusha	Monduli	Lolkisale	Tukusi	2371	2645	2645	99	0
Arusha	Monduli	Lolkisale	Lolkisale	7342	5489	5489	115	47
Arusha	Monduli	Lolkisale	NAFCO	3415	2177	2177	123	472
Arusha	Monduli	Lolkisale	Lemoti	10432	7484	7484	108	0
Arusha	Monduli	Lolkisale		23560	17795	17795	445	519
Arusha	Monduli	Makuyuni	Naiti	10122	6593	6593	149	0
Arusha	Monduli	Makuyuni	Makuyuni	9878	7985	7285	323	79
Arusha	Monduli	Makuyuni	Mbuyuni	4399	4262	4262	274	0
Arusha	Monduli	Makuyuni		24399	18840	18140	746	79
Arusha	Monduli	Mswakini	Mswakini Juu	8675	5487	5487	263	0
Arusha	Monduli	Mswakini	Naitolia	3854	3126	3126	264	0
Arusha	Monduli	Mswakini	Mswakini Chini	6965	4385	4385	236	0
Arusha	Monduli	Mswakini		19494	12998	12998	763	0
Arusha	Monduli	Esilalei	Oltukai	10766	8471	8699	123	0
Arusha	Monduli	Esilalei	Mungere	2744	3512	1512	0	0
Arusha	Monduli	Esilalei	Losirwa	10548	7132	7132	236	22
Arusha	Monduli	Esilalei	Manyara ranch	1472	0	677	17	0
Arusha	Monduli	Esilalei	Esilalei	11538	7633	7186	163	0
Arusha	Monduli	Esilalei		37068	26748	25206	539	22
Arusha	Monduli	Selela	Mbaash	11584	10871	12532	168	0
Arusha	Monduli	Selela	Selela	11499	10266	13422	213	0
Arusha	Monduli	Selela		23083	21137	25954	381	0
Arusha	Monduli	Engaruka	Engaruka Juu	8932	8326	9833	157	0
Arusha	Monduli	Engaruka	Engaruka Chini	7744	7286	8468	188	0
Arusha	Monduli	Engaruka		16676	15612	18301	345	0
Arusha	Monduli	Mto wa Mbu	Barabarani	1032	572	642	186	69
Arusha	Monduli	Mto wa Mbu	Migungani	2422	948	855	0	0
Arusha	Monduli	Mto wa Mbu	Jangwani	1488	1329	1012	194	38
Arusha	Monduli	Mto wa Mbu		4942	2849	2509	380	107
Arusha	Monduli	Majengo	Majengo	488	1732	733	204	123
Arusha	Monduli	Majengo	Migombani	386	583	214	164	144
Arusha	Monduli	Majengo	Kigongoni	638	1528	547	141	54
Arusha	Monduli	Majengo	Migungani	473	1064	694	197	0
Arusha	Monduli	Majengo		1985	4907	2188	706	321
Arusha	Monduli		JUMLA WILAYA	217410	186725	162464	8716	1461

## Sheet: KaratuDistrict
Region	District	Ward	Village	Cow	Goat	Sheep	Pig	Dog
Arusha	Karatu	Baray	Qandend	5514	13392	1536	425	449
Arusha	Karatu	Baray	Mbuga Nyekundu	7532	7983	1848	330	332
Arusha	Karatu	Baray	Dumbechand	13849	4716	2013	215	298
Arusha	Karatu	Baray	Jobaj	4279	8696	1273	110	132
Arusha	Karatu	Baray	Matala	18194	10892	1655	34	289
Arusha	Karatu	Qurus	Bashay	6714	5953	1302	535	196
Arusha	Karatu	Qurus	Gongali	4466	4662	1113	408	245
Arusha	Karatu	Qurus	Qurus	6243	5560	882	302	247
Arusha	Karatu	Daa	Changarawe	2737	2970	232	261	110
Arusha	Karatu	Daa	Endashagwet	4483	10052	1871	212	30
Arusha	Karatu	Daa	Mang’ola Juu	8381	6594	1773	62	226
Arusha	Karatu	Daa	Makhoromba	7750	3888	1734	118	174
Arusha	Karatu	Mang’ola	Mang’ola Barazani	5550	2764	2347	234	35
Arusha	Karatu	Mang’ola	Maleckchand	5299	2114	2261	45	27
Arusha	Karatu	Mang’ola	Endamaghan	7812	11284	6055	35	40
Arusha	Karatu	Mang’ola	Laghangarer	5349	5250	4109	37	36
Arusha	Karatu	Endamarariek	Bassodawish	7601	6346	2887	356	488
Arusha	Karatu	Endamarariek	Endamarariek	5021	8542	2109	419	478
Arusha	Karatu	Endamarariek	Endallah	2580	9712	725	415	543
Arusha	Karatu	Endamarariek	Getamock	10290	8908	2395	394	546
Arusha	Karatu	Endamarariek	Khusumay	4059	5118	1625	165	689
Arusha	Karatu	Kansay	Kansay	8911	3754	1459	418	35
Arusha	Karatu	Kansay	Ngaibara	2245	1920	533	131	38
Arusha	Karatu	Kansay	Laja	11208	4624	1913	182	19
Arusha	Karatu	Kansay	Kambi Faru	6254	4252	1053	313	48
Arusha	Karatu	Endabash	Endabash	6353	8080	2341	1261	955
Arusha	Karatu	Endabash	Qaru	8479	9022	4375	735	356
Arusha	Karatu	Buger	Buger	11234	6722	1423	259	187
Arusha	Karatu	Buger	Endanyowet	6935	5012	1043	205	198
Arusha	Karatu	Buger	Ayalio	4895	4462	1293	257	148
Arusha	Karatu	Mbulumbulu	Lositete	5320	5552	1893	106	86
Arusha	Karatu	Mbulumbulu	Upper Kitete	3772	5086	1353	169	98
Arusha	Karatu	Mbulumbulu	Slahhamo	3676	4692	1313	354	56
Arusha	Karatu	Mbulumbulu	Kambi Simba	4229	7320	1309	186	81
Arusha	Karatu	Rhotia	Rhotia Kati	3835	3300	1713	205	216
Arusha	Karatu	Rhotia	Rhotia Kainam	4004	3952	1275	258	229
Arusha	Karatu	Rhotia	Kilimatembo	3184	3526	1023	235	108
Arusha	Karatu	Rhotia	Kilimamoja	4406	5012	2053	126	102
Arusha	Karatu	Rhotia	Chemchem	4405	5134	1593	218	182
Arusha	Karatu	Ganako	Ayalabe	3602	2104	979	238	198
Arusha	Karatu	Ganako	Tloma	4075	3492	1345	186	161
Arusha	Karatu	Oldeani	Oldeani	3427	5160	1795	246	256
Arusha	Karatu	Karatu	G/arusha	4245	2312	1203	312	234
Arusha	Karatu	Karatu	Karatu mjini	245	98	32	87	521
Arusha	Karatu	Karatu	G/lambo	5201	2012	2412	123	189
Arusha	Karatu	Jumla kuu		267843	251996	78469	11922	10311

## Sheet: ManyaraRegion
Region	District	Ward	Imported Cattle	Local Cattle	Total Cattle	Imported Goats	Local Goats	Total Goats	Sheep	Pigs	Dogs
Manyara	Babati Rural	Gidas		6760	6760		4881	4881	2249	163	716
Manyara	Babati Rural	Mwada		25391	25391		16642	16642	7493	174	778
Manyara	Babati Rural	Ufana	80	6880	6960	22	7469	7491	329	217	797
Manyara	Babati Rural	Dabil	91	15159	15250	17	7731	7748	5354	611	1322
Manyara	Babati Rural	Magara	18	10220	10238	55	6656	6711	1689	618	837
Manyara	Babati Rural	Duru	0	7284	7284		5150	5150	1834	131	889
Manyara	Babati Rural	Endakiso	61	4785	4846	47	7141	7188	3301	29	473
Manyara	Babati Rural	Madunga	0	12174	12174	0	2328	2328	2766	460	488
Manyara	Babati Rural	Riroda	421	4716	5137	73	5781	5854	1367	396	845
Manyara	Babati Rural	Dareda	519	6984	7503	223	4442	4665	2398	1475	743
Manyara	Babati Rural	Arri	0	5625	5625	0	5236	5236	1933	464	526
Manyara	Babati Rural	Ayasanda	73	2968	3041	1	3290	3291	1627	9	447
Manyara	Babati Rural	Magugu	381	11670	12051	51	11847	11898	4839	620	1173
Manyara	Babati Rural	Bashneti	110	7661	7771	89	4500	4589	3583	2667	410
Manyara	Babati Rural	Nkaiti	35	38827	38862	74	21947	22021	14871	22	2687
Manyara	Babati Rural	Boay
Manyara	Babati Rural	Secheda	65	7722	7787	46	6843	6889	447	507	600
Manyara	Babati Rural	Kiru	0	5813	5813	0	6005	6005	1724	459	727
Manyara	Babati Rural	Gallapo	401	17384	17785	163	16340	16503	4453	214	1521
Manyara	Babati Rural	Qash	382	13641	14023	100	9044	9144	3799	47	1136
Manyara	Babati Rural	Mamire	68	8529	8597	79	11673	11752	2116	91	450
Manyara	Kiteto	Partimbo			14954			9494	2226	9	319
Manyara	Kiteto	Namelok			17889			30434	5541	159	580
Manyara	Kiteto	Bwagamoyo			1233			1112	16	174	111
Manyara	Kiteto	Kibaya			0			489	0	47	32
Manyara	Kiteto	Kijungu			6686			4231	1476	0	78
Manyara	Kiteto	Lengatei			32096			13641	3757	0	666
Manyara	Kiteto	Loolera			11103			19590	9605	0	164
Manyara	Kiteto	Engusero			9121			5694	6181	342	478
Manyara	Kiteto	Matui			13056			5396	1024	329	451
Manyara	Kiteto	Dosidosi			7472			2879	388	279	158
Manyara	Kiteto	Songambele			20578			14774	3215	0	126
Manyara	Kiteto	Magungu			14169			15613	6355	149	107
Manyara	Kiteto	Makami			35018			27960	15329	0	136
Manyara	Kiteto	Ndedo			27561			6850	3774	0	117
Manyara	Kiteto	Njoro			19235			14524	5001	7	383
Manyara	Kiteto	Kiperesa			17521			15474	5627	0	353
Manyara	Kiteto	Sunya			37102			18614	11200	17	207
Manyara	Kiteto	Dongo			30337			19152	1682	414	325
Manyara	Hanang	Bassotu			38409			15360	2234	824	1650
Manyara	Hanang	Mulbadaw			10294			7817	3874	69	133
Manyara	Hanang	Hirbadaw			16350			13580	900	210	393
Manyara	Hanang	Getanuwas			8524			5435	2337	236	807
Manyara	Hanang	Laghanga			9825			7564	5764	364	1482
Manyara	Hanang	Garawja			6501			7327	3111	780	612
Manyara	Hanang	Bassodesh			10167			10827	4942	1227	977
Manyara	Hanang	Measkron			6750			4517	2924	243	495
Manyara	Hanang	Endagaw			2304			2117	708	24	246
Manyara	Hanang	Endasiwold			2824			3702	2849	70	147
Manyara	Hanang	Endasak			892			816	279	30	102
Manyara	Hanang	Gitting			11476			9701	7422	990	690
Manyara	Hanang	Masakta			4314			3646	1370	196	890
Manyara	Hanang	Masqaroda			16377			7436	1426	1235	920
Manyara	Hanang	G’babieg			3639			3501	1634	158	484
Manyara	Hanang	B’lalu			16572			6199	2362	2421	1945
Manyara	Hanang	Lalaji			17767			11833	4317	127	1268
Manyara	Hanang	Gehandu			23367			13355	7508	591	860
Manyara	Hanang	Ishponga			6007			5971	1614	114	1151
Manyara	Hanang	Simbay			5870			9630	5130	248	1230
Manyara	Hanang	Sirop			5540			8360	4706	15	1278
Manyara	Hanang	Hidet			3362			2331	1135	152	165
Manyara	Hanang	G’lang			9038			14130	12170	123	3742
Manyara	Hanang	Katesh			874			610	312	126	87
Manyara	Hanang	Ganana			190			85	43	49	250
Manyara	Hanang	Jorodom			1625			1590	6616	350	250
Manyara	Hanang	Dumbeta			3560			3721	1760	485	440
Manyara	Hanang	Nangwa			2539			3307	1726	56	172
Manyara	Hanang	Dirma			18220			4146	2277	53	489
Manyara	Hanang	Wareta			6232			5352	3222	187	1004
Manyara	Hanang	Dawari			3384			3203	1946	136	438
Manyara	Hanang	Gendabi			4960			4836	4179	202	656
Manyara	Hanang	Mogitu			8459			8894	4097	1265	725
Manyara	Babati Urban	Babati	1448	1451	1451	2092	2662	2662	603	891	1588
Manyara	Babati Urban	Bagara	224	3750	3750	118	3935	3935	1102	380	532
Manyara	Babati Urban	Bonga	560	2215	2215	533	1815	1815	416	33	261
Manyara	Babati Urban	Maisaka	55	3627	3627	5	5093	5093	1110	89	630
Manyara	Babati Urban	Mutuka	5	3027	3027	39	4305	4305	722	8	250
Manyara	Babati Urban	Nangara	693	2093	2093	197	2809	2809	873	112	679
Manyara	Babati Urban	Sigino	193	4620	4620	144	5028	5028	1423	126	663
Manyara	Babati Urban	Singe	217	1670	1670	35	1371	1371	411	35	320
Manyara	Simanjiro	Naberara			80563			63339	33823	16	367
Manyara	Simanjiro	Komolo			12043			17990	8995	0	288
Manyara	Simanjiro	Ngorika			8486			14016	6271	64	139
Manyara	Simanjiro	R/remit			24465			19220	20218	0	185
Manyara	Simanjiro	Shambarai			12684			13973	1696	132	319
Manyara	Simanjiro	M/tembo			9763			8088	2504	76	207
Manyara	Simanjiro	Endiamtu			515			1552	747	28	78
Manyara	Simanjiro	Mererani			170			325	65	320	81
Manyara	Simanjiro	Terrat			25391			24586	22305	0	1081
Manyara	Simanjiro	Kitwai			28892			9684	4287	0	194
Manyara	Simanjiro	Langai			17989			21884	9529	5	417
Manyara	Simanjiro	Orksement			2280			2989	1080	98	53
Manyara	Simanjiro	Oljro No 5			20164			29503	6341		1128
Manyara	Simanjiro	Loboisorot			38559			19443	19190	0	358
Manyara	Simanjiro	Emboreet			34263			30475	26057	31	356
Manyara	Simanjiro	Naisinyai			29915			22292	10367	0	530
Manyara	Simanjiro	Loibosoit			18145			28483	16180	9	261
Manyara	Simanjiro	Endonyongijape			16517			16899	6000	0	254
